# Supplementary material for: Transcriptional activity mediated by β-CATENIN and TCF/LEF family members is completely dispensable for survival and propagation of multiple human colorectal cancer cell lines
Source: PubMed Central journal article supplement (PMC9822887; doi:10.1038/s41598-022-27261-0), 2023-01-06
Supplement: 41598_2022_27261_MOESM1_ESM.pdf [file 41598_2022_27261_MOESM1_ESM.pdf]

**Supplementary Information for:**

**Transcriptional activity mediated by  $\beta$ -CATENIN and TCF/LEF family members is completely dispensable for survival and propagation of multiple human colorectal cancer cell lines**

Janna Fröhlich, Katja Rose, and Andreas Hecht

This file contains:

Supplementary Figures S1 - S7

Supplementary Tables S1 - S4, S16 - S18

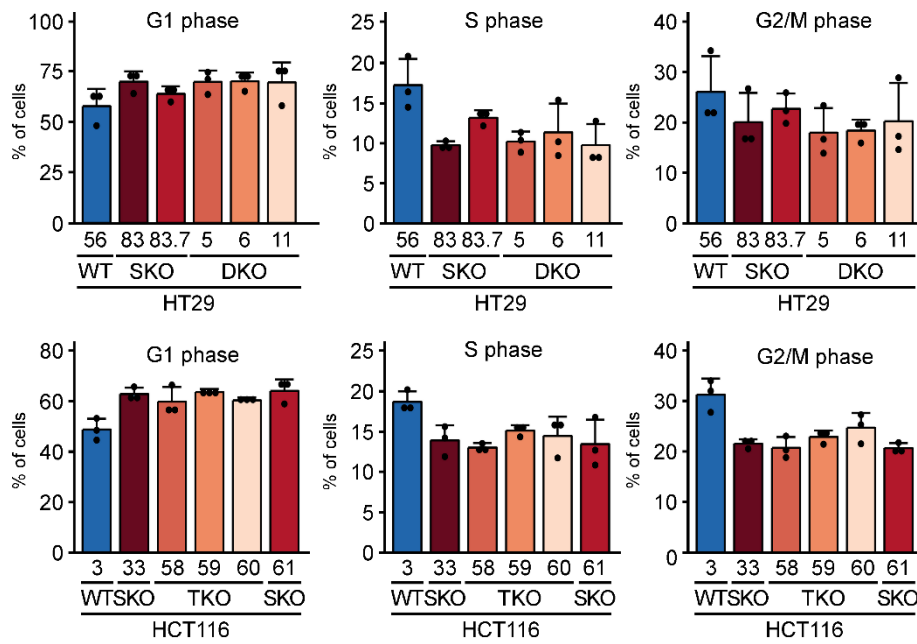

**Suppl. Fig. S1 Complete absence of TCF/LEF expression does not aggravate the proliferation defect resulting from TCF7L2-deficiency.** To examine differences in cell cycle distribution, HT29 and HCT116 cells with the genotypes indicated were stained with propidium iodide and analyzed by flow cytometry. The proportions of cells in different cell cycle phases are depicted by the bar plots. Each dot represents an individual measurement; the error bars indicate SD (n=3). Statistical significance of differences in the percentages of cells in different cell cycle phases was not analyzed for this series of experiments due to different group sizes of WT, SKO, DKO and TKO cell clones (see Methods).

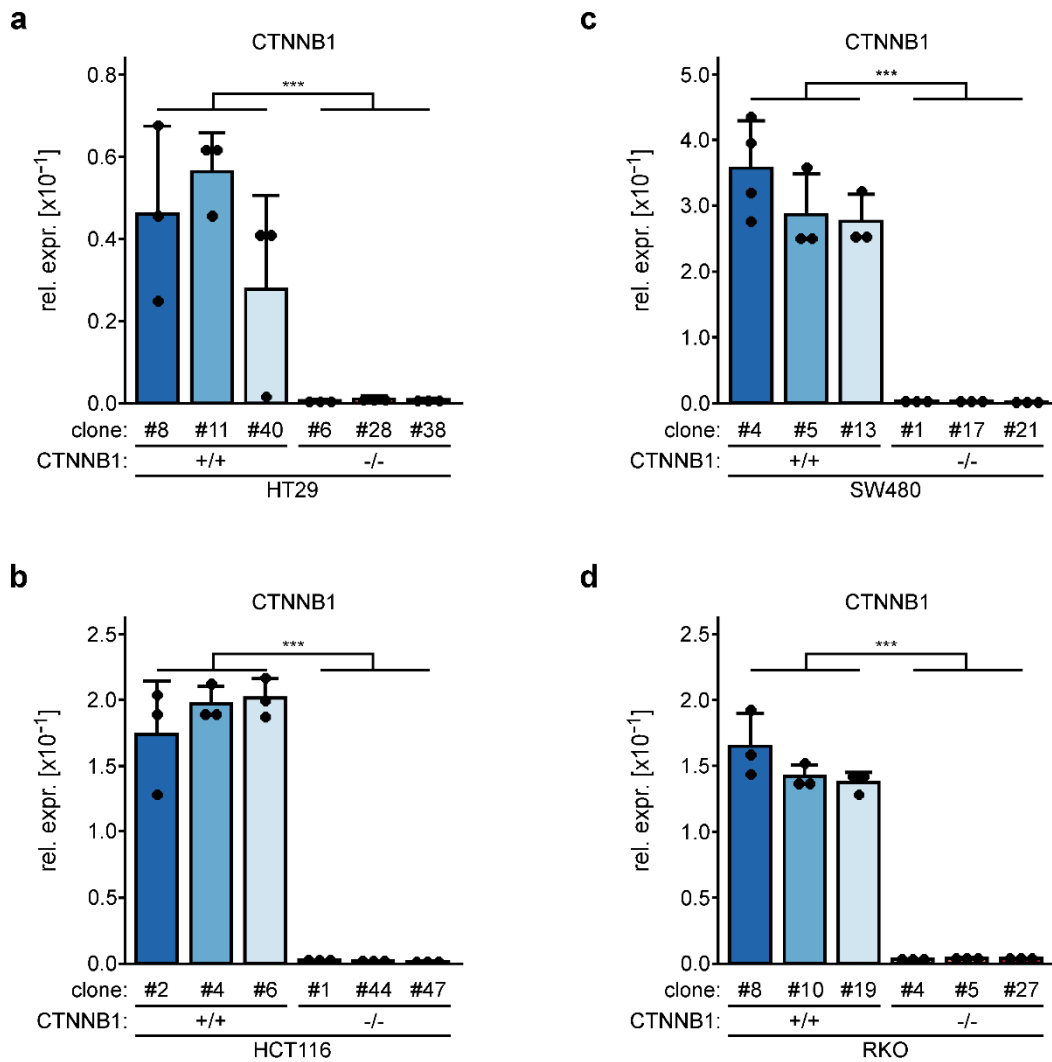

**Suppl. Fig. S2: Deletion of *CTNNB1* exon 7 results in vastly reduced RNA expression.** **a-d** Transcript levels of the *CTNNB1* gene were analyzed by qRT-PCR in HT29 (**a**), HCT116 (**b**), SW480 (**c**), and RKO (**d**) cell clones with biallelic wildtype and mutant *CTNNB1* genes. *CTNNB1* transcript levels were normalized to those of *GAPDH*, and are displayed as relative expression (rel. expr.). The bar graphs summarize the expression data; error bars indicate SD ( $n \geq 3$ ). Each dot represents an individual measurement. For statistical analyses, LMM was performed.

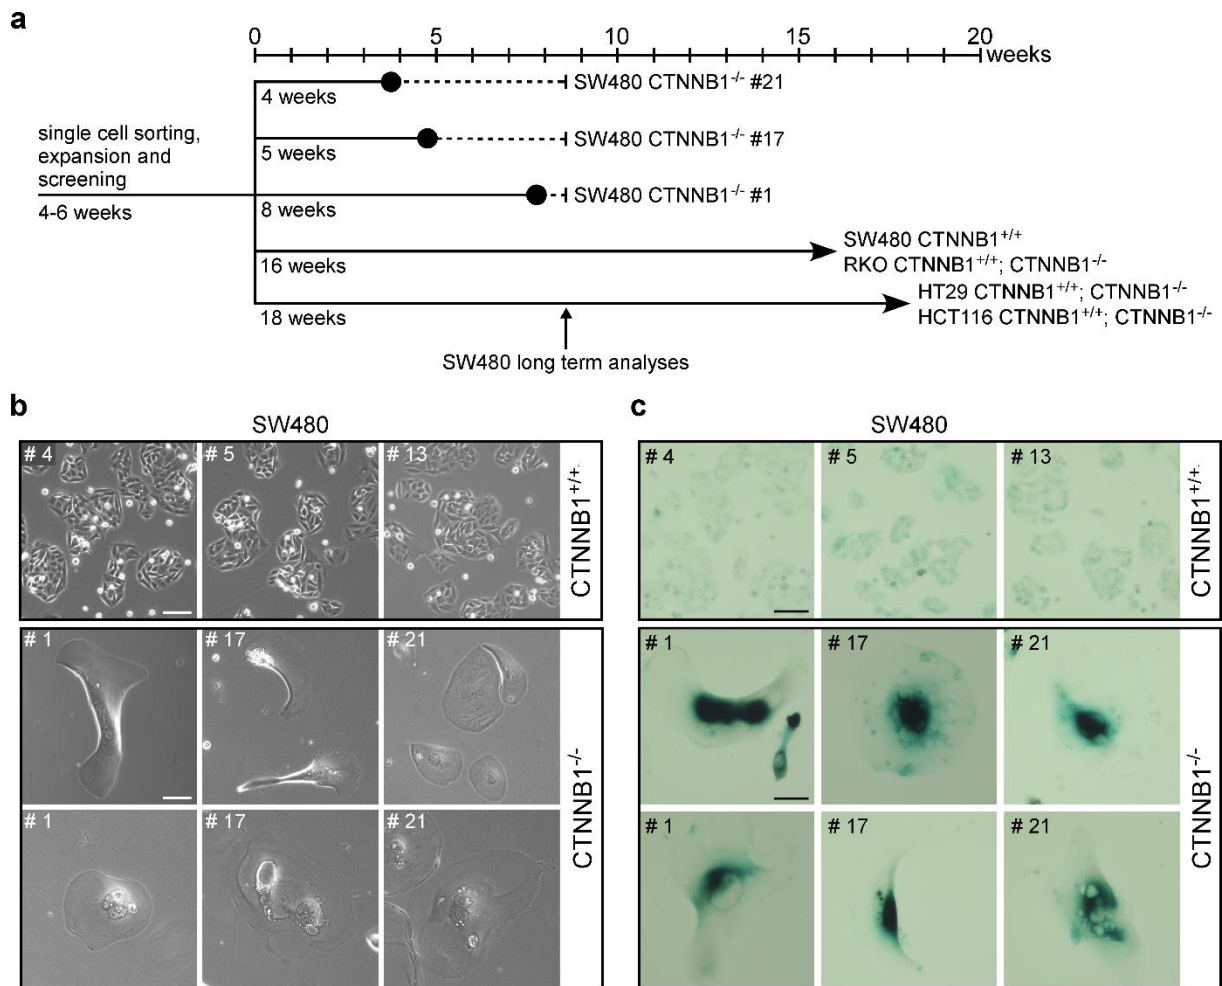

**Suppl. Fig. S3:  $\beta$ -CATENIN-deficient SW480 cells enter senescence after long term cell culture.** **a** Schematic representation of the cultivation times and growth behavior of *CTNNB1*<sup>+/+</sup> and *CTNNB1*<sup>-/-</sup> CRC cells as indicated. Large black dots represent the time points at which SW480 *CTNNB1*<sup>-/-</sup> cell clones stopped proliferating. Dashed lines show the additional time for which cell were kept in culture until analysis. Arrows denote that cells continue to proliferate. The vertical arrow indicates the time point at which all  $\beta$ -CATENIN-deficient SW480 cells were harvested and analyzed. **b** Representative micrographs showing *CTNNB1*<sup>+/+</sup> and *CTNNB1*<sup>-/-</sup> SW480 cell clones. Images from one of three independent biological replicates were taken approximately 16 weeks after expression of Cas9 and sgRNAs, and single cell-sorting. The scale bars represent 100  $\mu$ m. **c**  $\beta$ -GALACTOSIDASE stainings of *CTNNB1*<sup>+/+</sup> and *CTNNB1*<sup>-/-</sup> SW480 cell clones performed 14 - 16 weeks after expression of Cas9 and sgRNAs, and single cell-sorting. The pictures are representative micrographs from one of three independent biological replicates. The scale bars represent 100  $\mu$ m.

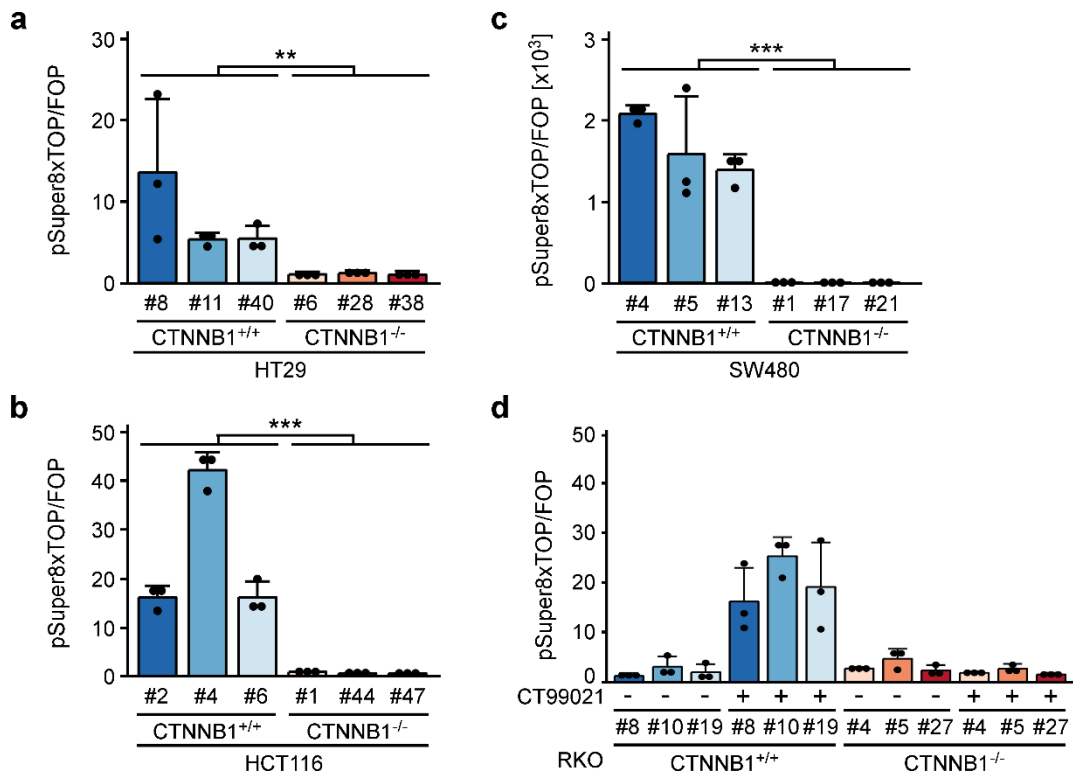

**Suppl. Fig. S4: Transcriptional activity of the Wnt/ $\beta$ -CATENIN pathway is abolished in  $\beta$ -CATENIN-deficient HT29, HCT116, SW480, and RKO cells.** a-d CTNNB1<sup>+/+</sup> and CTNNB1<sup>-/-</sup> HT29 (a), HCT116 (b), SW480 (c), and RKO cells (d) were cotransfected with expression vectors for *R. reniformis* and firefly luciferase reporter genes with wild type (pSuper8xTOPFlash) or mutant (pSuper8xFOPFlash) TCF/LEF binding sites in their promoter elements. RKO cells were additionally treated with CT99021 to stimulate Wnt pathway activity. Luciferase activities were determined 48 h post transfection. *R. reniformis* luciferase activities were used for normalization of firefly luciferase activities. The bar graphs show the ratios of normalized firefly luciferase activities from cells transfected with pSuper8xTOPFlash and with pSuper8xFOPFlash. Each dot represents an individual measurement. Error bars indicate SD (n=3). For statistical analysis LMM was performed.

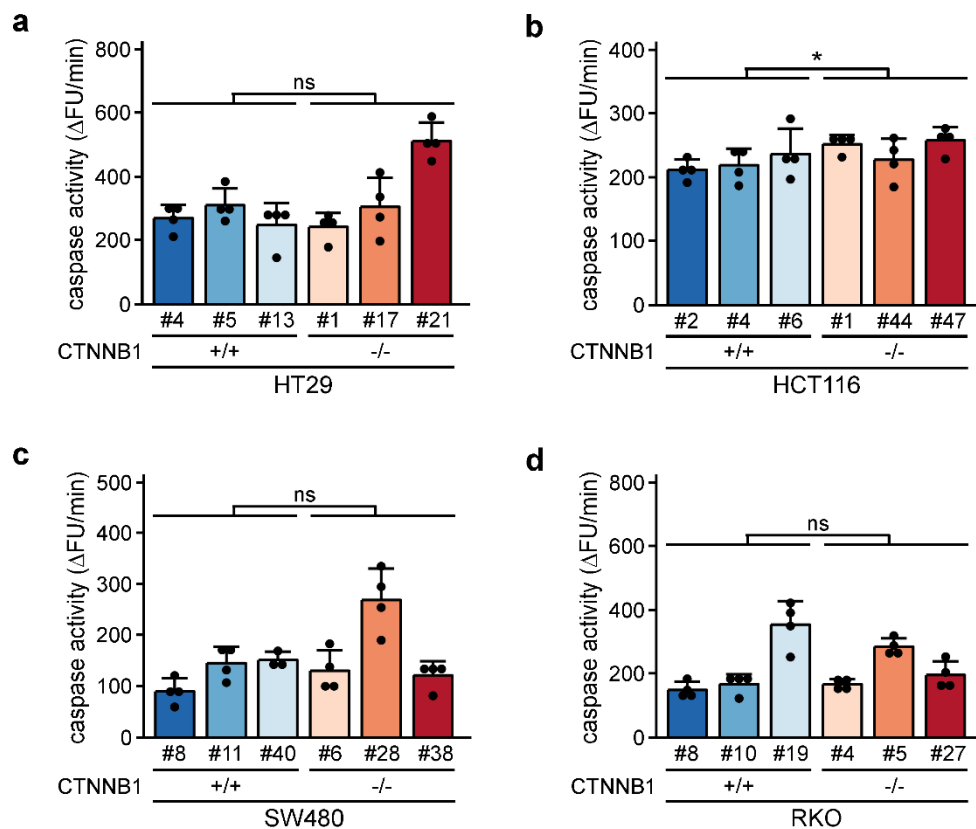

**Suppl. Fig. S5:  $\beta$ -CATENIN-deficiency does not lead to increased apoptosis in HT29, HCT116, SW480, and RKO cells.** a-d *CTNNB1*<sup>+/+</sup> and *CTNNB1*<sup>-/-</sup> HT29 (a), HCT116 (b), SW480 (c), and RKO (d) cells were seeded and incubated for 24 h. Upon cell lysis and preparation of whole cell extracts, caspase 3 activity was determined by a fluorimetric assay and kinetic measurements. The resulting changes in fluorescence units ( $\Delta$ FU) per min are displayed in the bar plots. Each dot represents an individual measurement. Error bars indicate SD (n=3). For statistical analysis LMM was performed. ns: not significant.

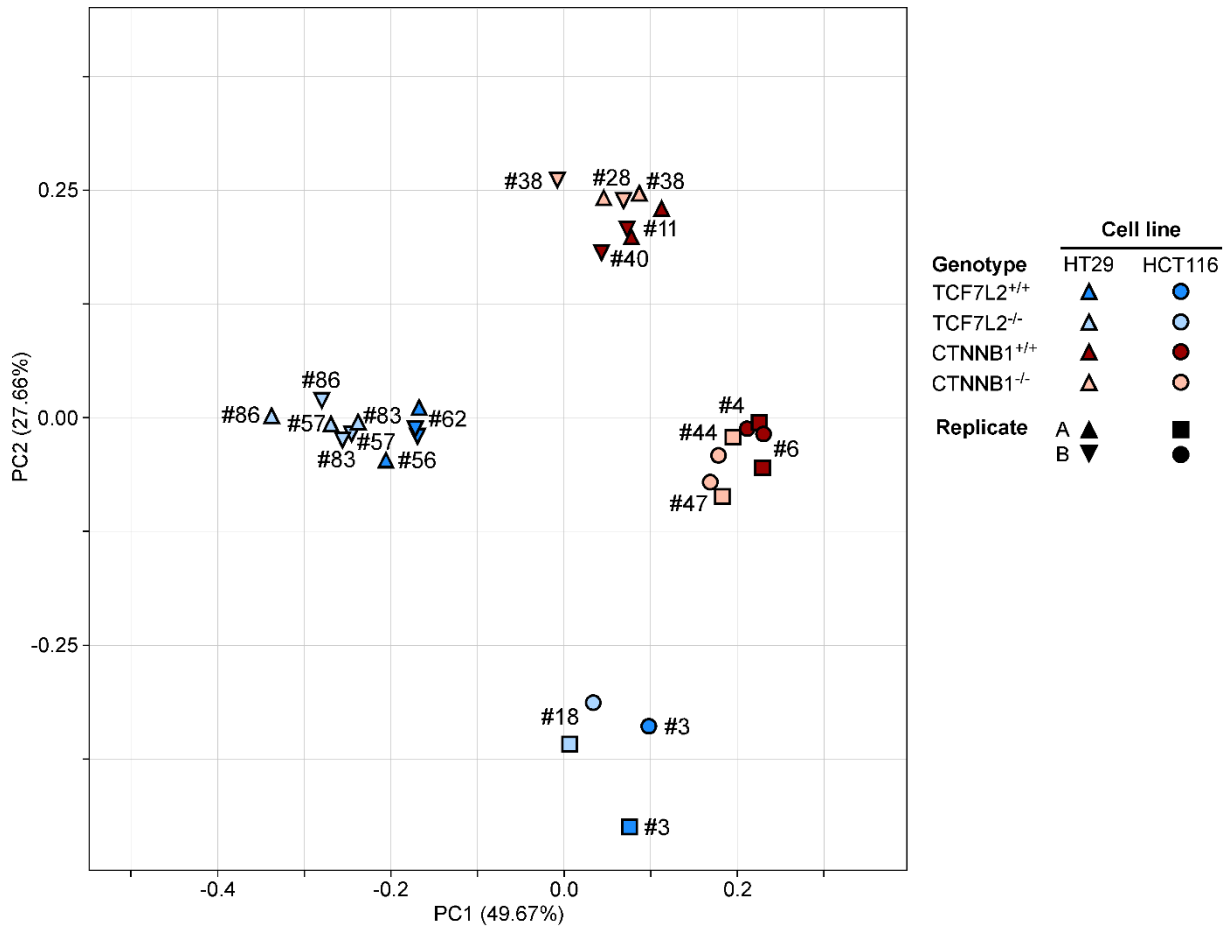

**Suppl. Fig. S6:** Principal component analysis (PCA) of transcriptome data derived from HT29 and HCT116 cell clones with biallelic WT (+/+) and mutant (-/-) *TCF7L2* and *CTNNB1* genes. Except for HCT116 *TCF7L2* WT and mutant cells, two different cell clones were analyzed by RNA-seq for each cell line and genotype. Two independent biological replicates were performed (n=2).

**Suppl. Fig. S7**

**Related to Figure 1b:**

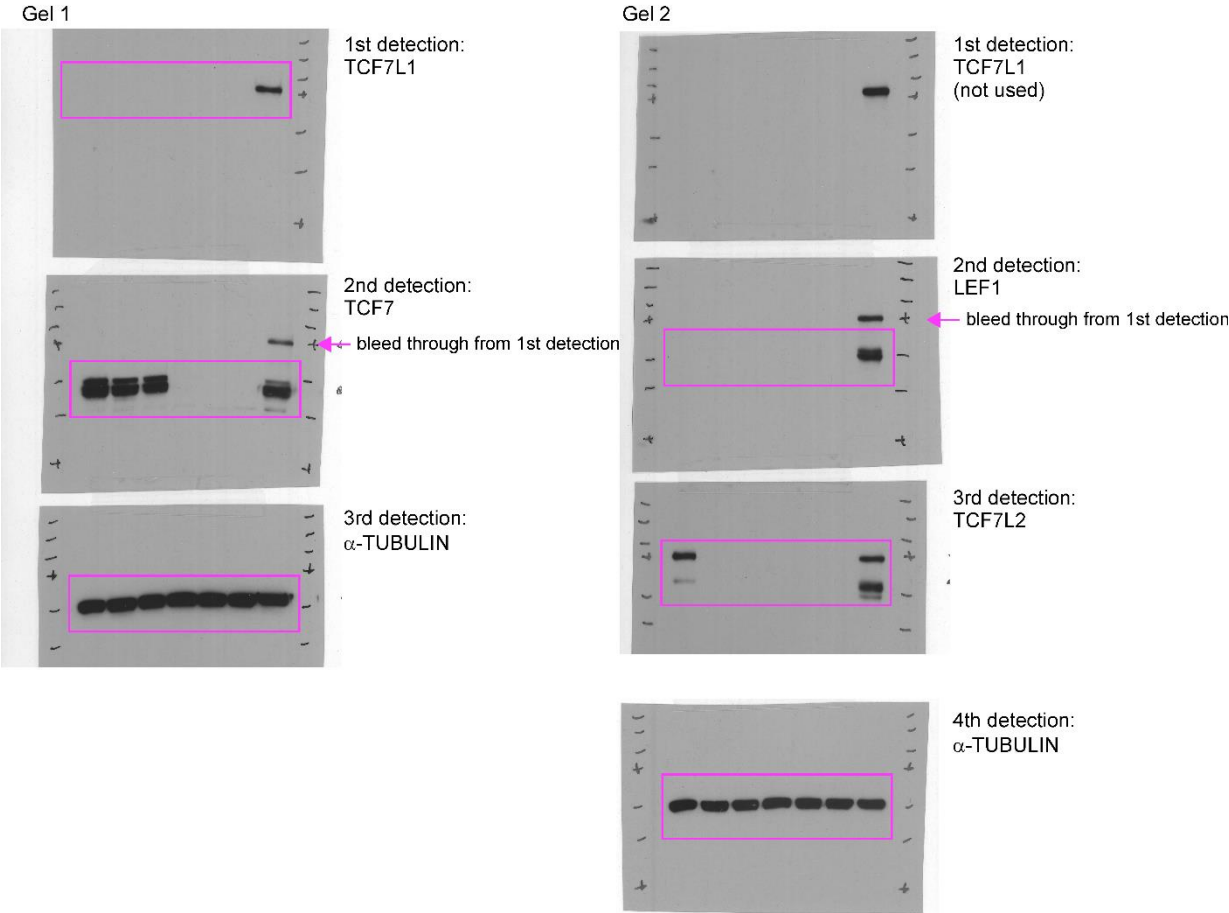

**Related to Figure 1c:**

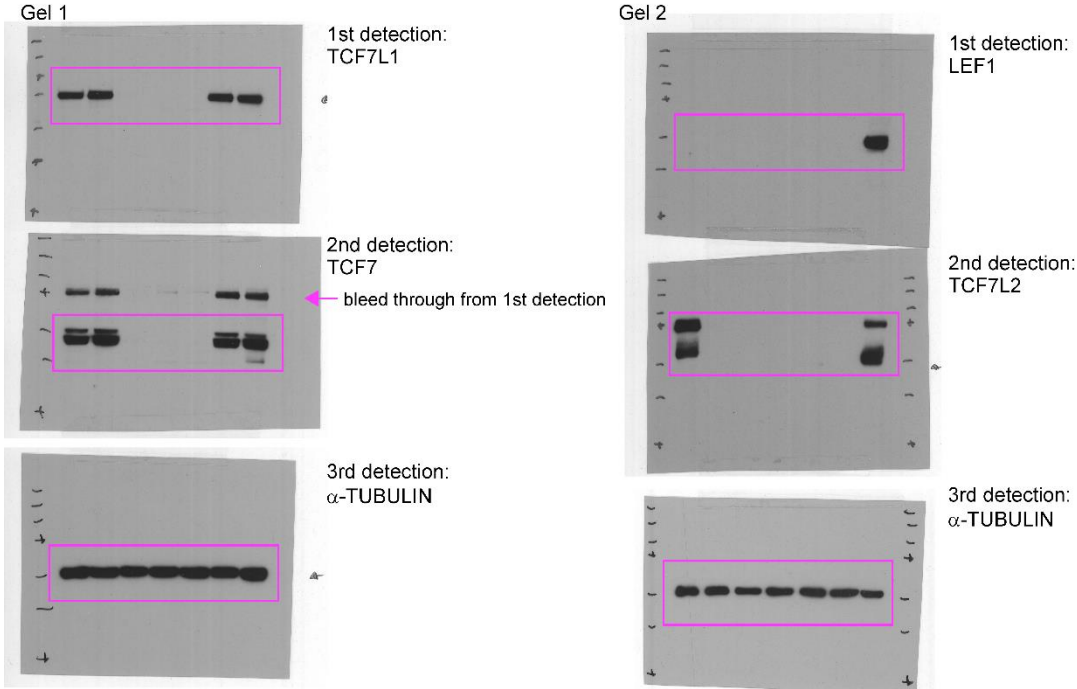

**Suppl. Fig. S7 continued →**



**Suppl. Fig. S7 continued:**

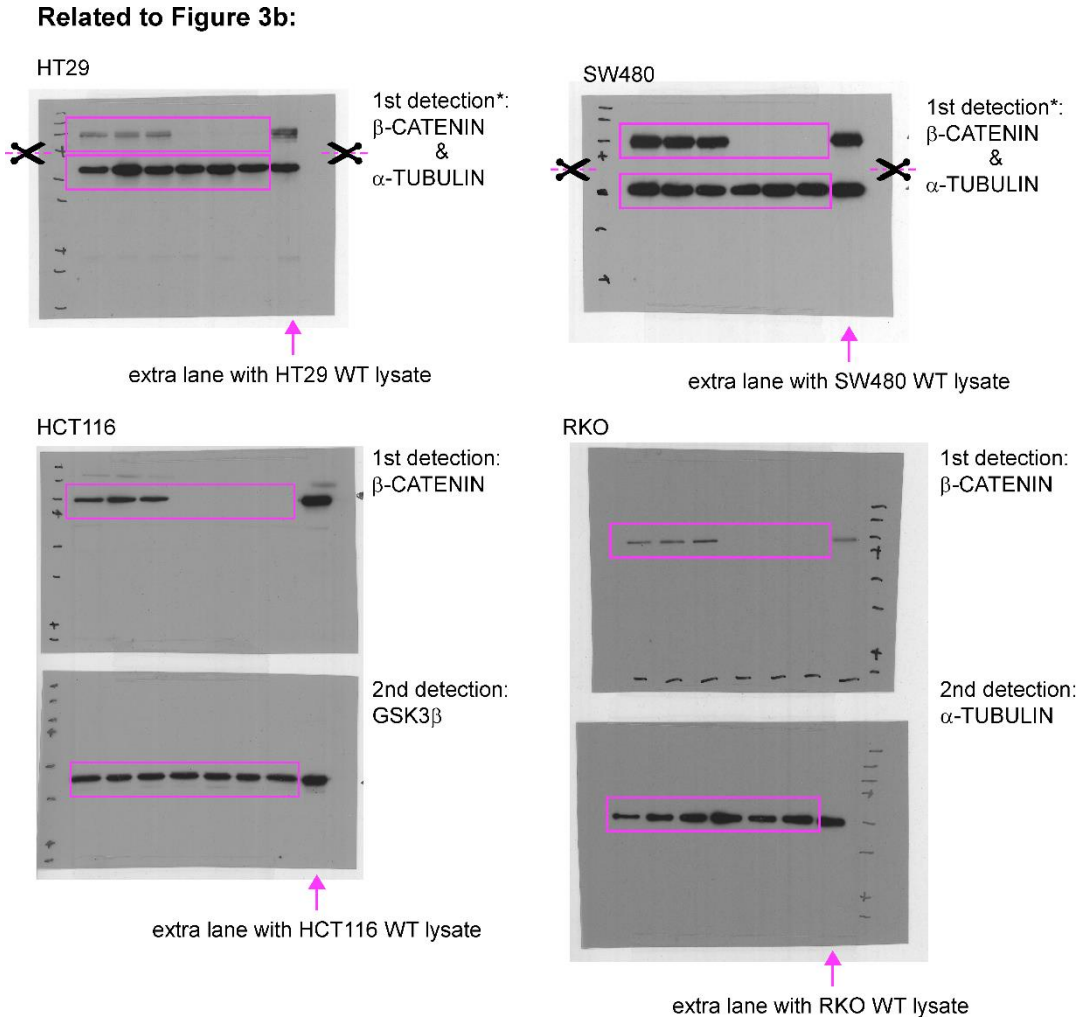

\*: after the gel run and transfer to nitrocellulose, the membrane was cut horizontally below the 75 kDa marker (4th from top, marked with a cross). The top and bottom parts of the membrane were then processed separately for detection of β-CATENIN and α-TUBULIN. However, for signal detection, the two pieces of membrane were reassembled.

**Suppl. Fig. S7: Full size images of Western blots shown in Figures 1 and 3 of the main manuscript.** Pink frames highlight areas used for display in the final versions of the figures. When membranes were sequentially probed, the order of detection is given and bleed-through signals reappearing during subsequent rounds of the detection, are marked.

**Supplementary Table S1: Cell lines used in this study**

| Cell line <sup>*,#</sup>                           | Source                                                                  | Culture conditions                                                                                                                                                                                                                                                                                       |
|----------------------------------------------------|-------------------------------------------------------------------------|----------------------------------------------------------------------------------------------------------------------------------------------------------------------------------------------------------------------------------------------------------------------------------------------------------|
| HCT116                                             | Max-Planck-Institute for Immunology and Epigenetics (Freiburg, Germany) | DMEM with 4.5 g/l glucose, stabilized glutamine, sodium pyruvate, and 3.7 g/l NaHCO <sub>3</sub> , supplemented with:<br>10 % (v/v) fetal calf serum<br>10 mM HEPES<br>1 % (v/v) MEM non-essential amino acids solution<br>1 % (v/v) penicillin/streptomycin<br>grown at 37 °C and 5 % CO <sub>2</sub> . |
| HCT116 TCF7L2 <sup>+/+</sup> clone 3 <sup>§</sup>  | derived from HCT116                                                     |                                                                                                                                                                                                                                                                                                          |
| HCT116 TCF7L2 <sup>-/-</sup> clone 33 <sup>§</sup> | derived from HCT116                                                     |                                                                                                                                                                                                                                                                                                          |
| HT29                                               | German Cancer Research Center Cell Line Service (Heidelberg, Germany)   |                                                                                                                                                                                                                                                                                                          |
| HT29 TCF7L2 <sup>+/+</sup> clone 56 <sup>§</sup>   | derived from HT29                                                       |                                                                                                                                                                                                                                                                                                          |
| HT29 TCF7L2 <sup>-/-</sup> clone 83 <sup>§</sup>   | derived from HT29                                                       |                                                                                                                                                                                                                                                                                                          |
| LoVo                                               | CLS Cell Lines Service GmbH (Eppenheim, Germany)                        |                                                                                                                                                                                                                                                                                                          |
| LS174T                                             | CLS Cell Lines Service GmbH (Eppenheim, Germany)                        |                                                                                                                                                                                                                                                                                                          |
| LS411                                              | Institute of Molecular Medicine and Cell Research (Freiburg, Germany)   |                                                                                                                                                                                                                                                                                                          |
| RKO                                                | Institute of Molecular Medicine and Cell Research (Freiburg, Germany)   |                                                                                                                                                                                                                                                                                                          |
| SW403                                              | ATCC, Manassas, Virginia, USA                                           |                                                                                                                                                                                                                                                                                                          |
| SW480                                              | Max-Planck-Institute for Immunology and Epigenetics (Freiburg, Germany) |                                                                                                                                                                                                                                                                                                          |

\* Cell line identity was determined by SNP-profiling at Multiplexion Inc. (Friedrichshafen, Germany).

# Cell lines were routinely tested for mycoplasma contamination using the MycoSensor PCR Assay Kit from Agilent (Agilent Technologies Deutschland GmbH, Waldbronn, Germany).

§ generation of these cell lines was described before (Wenzel et al., 2020).

**Supplementary Table S2: Summary of genome editing strategies and genotypes of cell clones generated in this study**

| Derived from HT29 <i>TCF7L2</i> <sup>-/-</sup> clone #83.7* (Wenzel et al., 2020) |                      |          |                   |
|-----------------------------------------------------------------------------------|----------------------|----------|-------------------|
| targeted gene: <i>TCF7</i>                                                        |                      |          |                   |
| clone ID                                                                          | sgRNAs used          | genotype | allele 1/2        |
| #5                                                                                | sgTCF7-1<br>sgTCF7-2 | KO       | Δ ENSE00003616545 |
| #6                                                                                | sgTCF7-1<br>sgTCF7-2 | KO       | Δ ENSE00003616545 |
| #11                                                                               | sgTCF7-1<br>sgTCF7-2 | KO       | Δ ENSE00003616545 |

\* For inactivation of *TCF7*, HT29 *TCF7L2*<sup>-/-</sup> #83.7 cells were used. These cells are derived from HT29 *TCF7L2*<sup>-/-</sup> cell clone #83 by lentiviral transduction with a *TCF7* cDNA construct which, however, is not expressed.

| Derived from HCT116 <i>TCF7L2</i> <sup>-/-</sup> clone #33 (Wenzel et al., 2020) |                            |          |                   |                              |          |                                                                           |
|----------------------------------------------------------------------------------|----------------------------|----------|-------------------|------------------------------|----------|---------------------------------------------------------------------------|
| clone ID                                                                         | targeted gene: <i>TCF7</i> |          |                   | targeted gene: <i>TCF7L1</i> |          |                                                                           |
|                                                                                  | sgRNAs used                | genotype | allele 1/2        | sgRNAs used                  | genotype | allele 1/2                                                                |
| #61                                                                              | sgTCF7-1<br>sgTCF7-2       | WT       | WT                | sgTCF7L1-1<br>sgTCF7L1-2     | WT       | WT                                                                        |
| #58                                                                              | sgTCF7-1<br>sgTCF7-2       | KO       | Δ ENSE00003616545 | sgTCF7L1-1<br>sgTCF7L1-2     | KO       | 209 bp deletion;<br>nucleotides 28-128 of<br>ENSE00000963602 <sup>a</sup> |
| #59                                                                              | sgTCF7-1<br>sgTCF7-2       | KO       | Δ ENSE00003616545 | sgTCF7L1-1<br>sgTCF7L1-2     | KO       | 272 bp deletion;<br>nucleotides 1-78 of<br>ENSE00000963602 <sup>a</sup>   |
| #60                                                                              | sgTCF7-1<br>sgTCF7-2       | KO       | Δ ENSE00003616545 | sgTCF7L1-1<br>sgTCF7L1-2     | KO       | 209 bp deletion;<br>nucleotides 28-128 of<br>ENSE00000963602 <sup>a</sup> |

| derived from HCT116 cells    |                          |          |                                                                        |
|------------------------------|--------------------------|----------|------------------------------------------------------------------------|
| targeted gene: <i>CTNNB1</i> |                          |          |                                                                        |
| clone ID                     | sgRNAs used              | genotype | allele 1/2                                                             |
| #2                           | sgCTNNB1-1<br>sgCTNNB1-2 | WT       | WT                                                                     |
| #4                           | sgCTNNB1-1<br>sgCTNNB1-2 | WT       | WT                                                                     |
| #6                           | sgCTNNB1-1<br>sgCTNNB1-2 | WT       | WT                                                                     |
| #1                           | sgCTNNB1-1<br>sgCTNNB1-2 | KO       | 258 bp deletion; nucleotides 17-145 of<br>ENSE00001643204 <sup>b</sup> |
| #44                          | sgCTNNB1-1<br>sgCTNNB1-2 | KO       | 258 bp deletion; nucleotides 17-145 of<br>ENSE00001643204 <sup>b</sup> |
| #47                          | sgCTNNB1-1<br>sgCTNNB1-2 | KO       | 258 bp deletion; nucleotides 17-145 of<br>ENSE00001643204 <sup>b</sup> |

continued →

| derived from HT29 cells      |                          |          |                                                                       |
|------------------------------|--------------------------|----------|-----------------------------------------------------------------------|
| targeted gene: <i>CTNNB1</i> |                          |          |                                                                       |
| clone ID                     | sgRNAs used              | genotype | allele 1/2                                                            |
| #8                           | sgCTNNB1-1<br>sgCTNNB1-2 | WT       | WT                                                                    |
| #11                          | sgCTNNB1-1<br>sgCTNNB1-2 | WT       | WT                                                                    |
| #40                          | sgCTNNB1-1<br>sgCTNNB1-2 | WT       | WT                                                                    |
| #6                           | sgCTNNB1-1<br>sgCTNNB1-2 | KO       | 258 bp deletion; nucleotides 17-145 of ENSE00001643204 <sup>b</sup>   |
| #28                          | sgCTNNB1-1<br>sgCTNNB1-2 | KO       | 258 bp deletion; nucleotides 17-145 of ENSE00001643204 <sup>b</sup>   |
| #38                          | sgCTNNB1-1<br>sgCTNNB1-2 | KO       | 258 bp deletion of nucleotides 17-145 of ENSE00001643204 <sup>b</sup> |

| derived from SW480 cells     |                          |          |                                                                     |
|------------------------------|--------------------------|----------|---------------------------------------------------------------------|
| targeted gene: <i>CTNNB1</i> |                          |          |                                                                     |
| clone ID                     | sgRNAs used              | genotype | allele 1                                                            |
| #4                           | sgCTNNB1-1<br>sgCTNNB1-2 | WT       | WT                                                                  |
| #5                           | sgCTNNB1-1<br>sgCTNNB1-2 | WT       | WT                                                                  |
| #13                          | sgCTNNB1-1<br>sgCTNNB1-2 | WT       | WT                                                                  |
| #1                           | sgCTNNB1-1<br>sgCTNNB1-2 | KO       | 258 bp deletion; nucleotides 17-145 of ENSE00001643204 <sup>b</sup> |
| #17                          | sgCTNNB1-1<br>sgCTNNB1-2 | KO       | 258 bp deletion; nucleotides 17-145 of ENSE00001643204 <sup>b</sup> |
| #21                          | sgCTNNB1-1<br>sgCTNNB1-2 | KO       | 258 bp deletion; nucleotides 17-145 of ENSE00001643204 <sup>b</sup> |

| derived from RKO cells       |                          |          |                                                                     |
|------------------------------|--------------------------|----------|---------------------------------------------------------------------|
| targeted gene: <i>CTNNB1</i> |                          |          |                                                                     |
| clone ID                     | sgRNAs used              | genotype | allele 1/2                                                          |
| #8                           | sgCTNNB1-1<br>sgCTNNB1-2 | WT       | WT                                                                  |
| #10                          | sgCTNNB1-1<br>sgCTNNB1-2 | WT       | WT                                                                  |
| #19                          | sgCTNNB1-1<br>sgCTNNB1-2 | WT       | WT                                                                  |
| #4                           | sgCTNNB1-1<br>sgCTNNB1-2 | KO       | 258 bp deletion; nucleotides 17-145 of ENSE00001643204 <sup>b</sup> |
| #5                           | sgCTNNB1-1<br>sgCTNNB1-2 | KO       | 258 bp deletion; nucleotides 17-145 of ENSE00001643204 <sup>b</sup> |
| #27                          | sgCTNNB1-1<br>sgCTNNB1-2 | KO       | 258 bp deletion; nucleotides 17-145 of ENSE00001643204 <sup>b</sup> |

<sup>a</sup> coordinates refer to the 5'-end of ENSE00000963602

<sup>b</sup> coordinates refer to the 5'-end of ENSE00001643204

**Supplementary Table S3: Results of genotyping PCRs for all knock-out attempts of this study**

| Gene(s) targeted                | TCF7                 |      | TCF7 / TCF7L1        |             |
|---------------------------------|----------------------|------|----------------------|-------------|
| Cell line                       | HT29 TCF7L2 KO #83.7 |      | HCT116 TCF7L2 KO #33 |             |
| total number of clones screened | 37                   |      | 61                   |             |
| wild type                       | 2                    | 5 %  | 7 / 32               | 11 % / 52 % |
| heterozygous                    | 22                   | 59 % | 15 / 16              | 25 % / 26 % |
| homozygous mutant               | 10                   | 27 % | 20 / 9               | 33 % / 15 % |
| unclear                         | 3                    | 8 %  | 19 / 4               | 31 % / 7 %  |

| Gene targeted                   | CTNNB1 |      |        |      |       |      |     |      |
|---------------------------------|--------|------|--------|------|-------|------|-----|------|
| Cell line                       | HT29   |      | HCT116 |      | SW480 |      | RKO |      |
| total number of clones screened | 59     |      | 86     |      | 49    |      | 128 |      |
| wild type                       | 17     | 29 % | 24     | 28 % | 12    | 24 % | 44  | 34 % |
| heterozygous                    | 7      | 12 % | 24     | 28 % | 20    | 41 % | 51  | 40 % |
| homozygous mutant               | 16     | 27 % | 31     | 36 % | 7     | 14 % | 21  | 16 % |
| unclear                         | 19     | 32 % | 7      | 8 %  | 10    | 20 % | 12  | 9 %  |

| Gene targeted                   | CTNNB1 |      |        |      |        |      |       |      |
|---------------------------------|--------|------|--------|------|--------|------|-------|------|
| Cell line                       | LS411* |      | LS174T |      | SW403* |      | LoVo* |      |
| total number of clones screened | 17     |      | 105    |      | 26     |      | 11    |      |
| wild type                       | 16     | 94 % | 98     | 93 % | 20     | 77 % | 9     | 82 % |
| heterozygous                    | 0      | 0 %  | 1      | 1 %  | 0      | 0 %  | 1     | 9 %  |
| homozygous mutant               | 0      | 0 %  | 0      | 0 %  | 0      | 0 %  | 0     | 0 %  |
| unclear                         | 1      | 6 %  | 6      | 6 %  | 6      | 23 % | 1     | 9 %  |

\*: in case of these cell lines, the number of clones screened equals the number of clones which could be recovered from a total of four 96-well plates after transfection and single-cell sorting. This could indicate limited clonogenicity of these cell lines.

**Supplementary Table S4: Colorectal cancer driver pathway mutations<sup>1</sup> in the cell lines used in this study**

| Cell line | MSI status <sup>2</sup> | CIMP status | APC | FBXW7 | CTNNB1           | TCF7 | TCF7L1 | TCF7L2 | LEF1 | KRAS | BRAF | PIK3CA | TP53 | SMAD4            | TGFBR2 |
|-----------|-------------------------|-------------|-----|-------|------------------|------|--------|--------|------|------|------|--------|------|------------------|--------|
| HCT116    | U                       | +           | +/+ | +/+   | +/-              | +/+  | +/+    | +/+    | +/+  | +/-  | +/+  | +/-    | +/+  | +/+              | -/-    |
| HT29      | S                       | +           | -/- | +/+   | +/+              | +/+  | +/+    | +/+    | +/+  | +/+  | +/-  | +/-    | -/-  | -/-              | +/+    |
| LoVo      | U                       | -           | -/- | +/+   | +/+              | +/-  | +/+    | +/-    | +/+  | +/-  | +/+  | +/+    | +/+  | +/+              | -/-    |
| LS174T    | U                       | -           | +/+ | +/+   | -/-              | +/-  | +/-    | +/-    | +/+  | +/-  | +/-  | +/-    | +/+  | +/+              | -/-    |
| LS411     | U                       | +           | -/- | +/+   | +/+              | +/+  | +/+    | +/+    | +/+  | +/+  | +/-  | +/+    | -/-  | +/+              | -/-    |
| RKO       | U                       | +           | +/+ | +/+   | +/- <sup>3</sup> | +/+  | +/-    | +/-    | +/+  | +/+  | +/-  | +/-    | +/+  | +/+              | +/+    |
| SW403     | S                       | -           | -/- | +/+   | +/+              | +/+  | +/+    | +/+    | +/+  | +/-  | +/+  | +/-    | -/-  | +/+ <sup>4</sup> | -/-    |
| SW480     | S                       | -           | -/- | +/+   | +/+              | +/+  | +/+    | +/+    | +/+  | +/-  | +/+  | +/+    | -/-  | +/+ <sup>4</sup> | -/-    |

<sup>1</sup>: Information about microsatellite instability (MSI), CpG island methylator phenotype (CIMP), and mutational states of the genes listed were taken from Mouradov et al., 2014.

<sup>2</sup>: U - unstable; S - stable

<sup>3</sup>: one allele of *CTNNB1* carries a silent mutation in RKO cells (Mouradov et al., 2014)

<sup>4</sup>: despite the wild type status of *SMAD4* reported by Mouradov and colleagues (Mouradov et al., 2014) no SMAD4 protein can be detected in SW480 and SW403 cells (Woodford-Richens et al., 2001; Frey et al., 2022)

**Supplementary Table S16: List of sgRNA target sequences (without PAM)**

| Gene   | sgRNA      | Location | Sequence (5' - 3')   |
|--------|------------|----------|----------------------|
| CTNNB1 | sgCTNNB1-1 | exon 7   | CTCATCATACTGGCTAGTGG |
| CTNNB1 | sgCTNNB1-2 | intron 7 | GGTACTCTGAATGTAAATCT |
| TCF7   | sgTCF7-1   | intron 3 | GTGAGTGTGGCGAGTCCTGA |
| TCF7   | sgTCF7-2   | intron 4 | CCTGGGGCTGTGCAAATAA  |
| TCF7L1 | sgTCF7L1-1 | exon 3   | TTAAAGAACGCGCTGTCCTG |
| TCF7L1 | sgTCF7L1-1 | intron 3 | CTGCTTGGGATCGGCGCAGA |

**Supplementary Table S17: List of oligonucleotide primers used in this study**

| <b>Primers for genotyping</b> |                                 |                                 |
|-------------------------------|---------------------------------|---------------------------------|
| <b>Gene</b>                   | <b>Forward primer (5' - 3')</b> | <b>Reverse primer (5' - 3')</b> |
| CTNNB1                        | GGACAAGTTGGATAGGGCCC            | GCACACGAAACCCCTGTGA             |
| TCF7                          | GCAAAGTCTTGGGGGCTAGT            | GGGTCACCCATGGGATTTAGG           |
| TCF7L1                        | GCTCACCCGCTCTTGCCTTTGT          | GAGGACAACGTCGCCAACCCAG          |
| <b>Primers for qRT-PCR</b>    |                                 |                                 |
| <b>Gene</b>                   | <b>Forward primer (5' - 3')</b> | <b>Reverse primer (5' - 3')</b> |
| ASCL2                         | TGACCTGGGGCGTAATAAAG            | ACACAGGCTTCTCCCTAGCA            |
| AXIN2                         | TGCTTTCGTGGAAATGACAG            | AGGTGTGTGGAGGAAAGGTG            |
| CTNNB1                        | ACTGGCAGCAACAGTCTTAC            | GTGGCAAGTTCTGCATCATC            |
| GAPDH                         | ACCACAGTCCATGCCATCACT           | GTCCACCACCCTGTTGCTGTA           |
| LEF1                          | ACAGATCACCCACCTCTTG             | TGAGGCTTCACGTGCATTAG            |
| MYC                           | AAGAGGACTTGTTGCGGAAA            | CTCAGCCAAGGTTGTGAGGT            |
| RNF43                         | CTGCTACCAGAAACCCAGG             | CTGCGGTGTCAGAACTCCAT            |
| TCF7                          | AGCCAAGGTCATTGCAGAGT            | GTGGTGGATTCTTGGTGCTT            |
| TCF7L1                        | GGGTACCCCTTCCTGATGAT            | GATGGTGACCTCGTGTCCTT            |
| TCF7L2                        | AGAAAAGAAGAAGCCCCACA            | CGGGCCAGCTCGTAGTATT             |
| TERT                          | CTACGGCGACATGGAGAACA            | AGAGATGACGCGCAGGAAAA            |



**Supplementary Table S18: List of antibodies used in this study**

| Antigen           | Species of origin | Dilution | Supplier (catalogue no.)          |
|-------------------|-------------------|----------|-----------------------------------|
| $\alpha$ -TUBULIN | mouse             | 1:10 000 | Sigma-Aldrich (T9026)             |
| $\beta$ -CATENIN  | rabbit            | 1:1000   | Cell Signaling Technology (#9581) |
| LEF1              | rabbit            | 1:1000   | Cell Signaling Technology (#2230) |
| TCF7              | rabbit            | 1:1000   | Cell Signaling Technology (#2203) |
| TCF7L1            | rabbit            | 1:1000   | Cell Signaling Technology (#2883) |
| TCF7L2            | rabbit            | 1:1000   | Cell Signaling Technology (#2565) |

## References

- Frey, P., Devisme, A., Rose, K., Schrempp, M., Freiher, V., Andrieux, G., Boerries, M., and Hecht, A. (2022). SMAD4 mutations do not preclude epithelial-mesenchymal transition in colorectal cancer. *Oncogene* 41, 824-837.
- Mouradov, D., Sloggett, C., Jorissen, R.N., Love, C.G., Li, S., Burgess, A.W., Arango, D., Strausberg, R.L., Buchanan, D., and Wormald, S., et al. (2014). Colorectal cancer cell lines are representative models of the main molecular subtypes of primary cancer. *Cancer Res* 74, 3238-3247.
- Wenzel, J., Rose, K., Haghighi, E.B., Lamprecht, C., Rauen, G., Freiher, V., Kesselring, R., Boerries, M., and Hecht, A. (2020). Loss of the nuclear Wnt pathway effector TCF7L2 promotes migration and invasion of human colorectal cancer cells. *Oncogene* 39, 3893-3909.
- Woodford-Richens, K.L., Rowan, A.J., Gorman, P., Halford, S., Bicknell, D.C., Wasan, H.S., Roylance, R.R., Bodmer, W.F., and Tomlinson, I.P. (2001). SMAD4 mutations in colorectal cancer probably occur before chromosomal instability, but after divergence of the microsatellite instability pathway. *Proc Natl Acad Sci U S A* 98, 9719-9723.
